# Supplementary material for: Detection of Porcine Deltacoronavirus RNA in the Upper and Lower Respiratory Tract and Biliary Fluid and the Effect of Infection on Serum Cholesterol Levels and Blood T Cell Population Frequencies in Gnotobiotic Piglets
Source: MDPI journal article supplement (doi:10.3390/vetsci10020117), 2023-02-04
Supplement: s1 [file s1]

# **Figure S1: Gating strategies for T cell population frequencies in blood samples from inoculated and control animals**

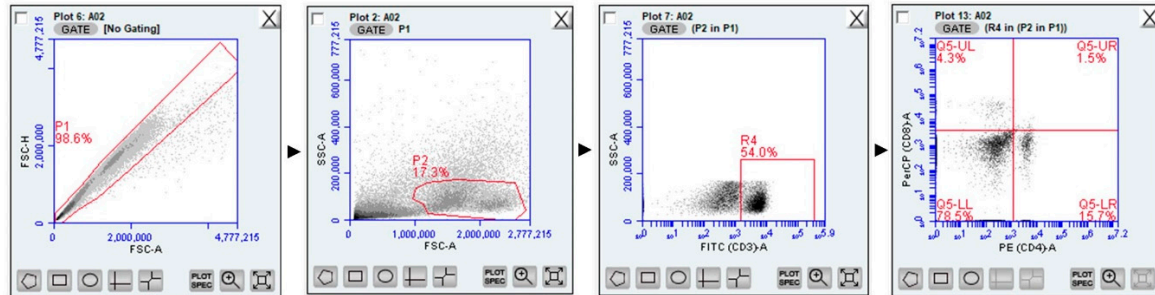

*Figure S1: Gating strategies for estimating frequencies of T cells, here shown for one sample as an example. CD3<sup>+</sup> cells were stained with FITC, CD4<sup>+</sup> cells with PE, and CD8<sup>+</sup> cells with SPRD detected with the PerCP filter. R4 corresponds to the population of CD3<sup>+</sup> cells (plot 7). In the plot to the right (plot 13), the lower right (LR) quadrant indicates the frequency of CD4<sup>+</sup>CD8<sup>−</sup> cells (T helper cells, 15.7%), the upper left (UL) quadrant indicates the frequency of CD4<sup>−</sup>CD8<sup>+</sup> cells (cytotoxic T cells, 4.3%), and the upper right (UR) quadrant indicates the frequency of CD4<sup>+</sup>CD8<sup>+</sup> (double-positive T cells, 1.5%).*
