# Supplementary material for: Detection of Porcine Deltacoronavirus RNA in the Upper and Lower Respiratory Tract and Biliary Fluid and the Effect of Infection on Serum Cholesterol Levels and Blood T Cell Population Frequencies in Gnotobiotic Piglets
Source: MDPI journal article supplement (doi:10.3390/vetsci10020117), 2023-02-04
Supplement: s1 [file s1]

**Table S2: Numbers of piglets (or samples) tested in each analysis at 2, 4, and 7 DPI**

| Analysis                                      | Inoculated piglets                    |       |       | Control piglets                       |       |       |
|-----------------------------------------------|---------------------------------------|-------|-------|---------------------------------------|-------|-------|
|                                               | 2 DPI                                 | 4 DPI | 7 DPI | 2 DPI                                 | 4 DPI | 7 DPI |
|                                               | Number of piglets (or samples) tested |       |       | Number of piglets (or samples) tested |       |       |
| RT-qPCR: RS                                   | 12                                    | 8     | 3     | 6                                     | 4     | 2     |
| RT-qPCR: BF                                   | 4                                     | 4     | 1     | 1                                     | 1     | 2     |
| RT-qPCR: BAL                                  | 4                                     | 4     | 3     | 2                                     | 2     | 2     |
| RT-qPCR: NW                                   | 4                                     | 4     | 3     | 2                                     | 2     | 2     |
| RT-qPCR: NS                                   | 12                                    | 8     | 3     | 6                                     | 4     | 2     |
| Flow cytometry: T cell population frequencies | 4                                     | 3     | 3     | 2                                     | 2     | 1     |
| Colorimetric assay: Serum total cholesterol   | 11                                    | 6     | 2     | 3                                     | 3     | 2     |

*Table S2: Numbers of piglets (or samples) tested in RT-qPCR, flow cytometry, and colorimetric analyses. For RT-qPCR, rectal swab (RS), biliary fluid (BF), bronchoalveolar lavage (BAL), nasal wash (NW), and nasal swab (NS) samples were tested. T cell population frequencies were measured in blood samples of piglets.*
