# Supplementary material for: Detection of Porcine Deltacoronavirus RNA in the Upper and Lower Respiratory Tract and Biliary Fluid and the Effect of Infection on Serum Cholesterol Levels and Blood T Cell Population Frequencies in Gnotobiotic Piglets
Source: MDPI journal article supplement (doi:10.3390/vetsci10020117), 2023-02-04
Supplement: s1 [file s1]

**Table S1:  $p$  values for statistical tests on data for T cell population frequencies**

|          | 2 DPI        | 4 DPI       | 7 DPI        |
|----------|--------------|-------------|--------------|
| CD4+CD8– | 0.59 (11.41) | 0.59 (3.27) | 0.79 (27.80) |
| CD4–CD8+ | 0.84 (2.88)  | 0.45 (0.42) | 0.45 (1.37)  |
| CD4+CD8+ | 0.87 (0.85)  | 0.82 (0.12) | 0.84 (1.33)  |

*Table S1.  $P$  values obtained by multiple unpaired  $T$  tests on data for T cell population frequencies when testing for a difference between the inoculated group and the control group. The number in parenthesis is the SE of the difference between the groups. The  $P$  value is adjusted with the Holm-Šidák method for multiple tests.*
